# Supplementary material for: Machine learning of phase diagrams
Source: Royal Society of Chemistry journal article supplement (doi:10.1039/d2ma00524g), 2022-01-01
Supplement: d2ma00524g1.pdf [file d2ma00524g1.pdf]

# Machine Learning of Phase Diagrams: Supplemental Information

J. Lund<sup>†</sup>, H. Wang<sup>†</sup>, R. Braatz<sup>‡</sup>, and R.E. García<sup>†,\*</sup>

<sup>†</sup>: School of Materials Engineering,

Purdue University, West Lafayette, IN 47907 USA

<sup>‡</sup>: Department of Chemical Engineering,

Massachusetts Institute of Technology, Cambridge, MA 02139 USA

\*: Corresponding author; email: redwing@purdue.edu

February 19, 2022

# Supplementary Information

## S1 Table of Symbols

Table S1: Glossary of symbols.

| Name                                                    | Definition                                                                                                                                        | Units        |
|---------------------------------------------------------|---------------------------------------------------------------------------------------------------------------------------------------------------|--------------|
| $a$                                                     | leftmost end member of pseudo-binary PD                                                                                                           | —            |
| $a_j$                                                   | temperature independent portion of $j$ th Redlich Kister parameter                                                                                | J/mol        |
| $b$                                                     | rightmost end member of pseudo-binary PD                                                                                                          | —            |
| $b_j$                                                   | temperature dependent portion of $j$ th Redlich Kister parameter                                                                                  | J/(mol K)    |
| $c_i$                                                   | concentration of the $i$ th component of the system                                                                                               | mol fraction |
| $c_p$                                                   | heat capacity                                                                                                                                     | J/(mol K)    |
| $c_o$                                                   | stable concentration of stoichiometric compound                                                                                                   | mol fraction |
| $\mathcal{F}$                                           | Faraday's constant                                                                                                                                | C/mol        |
| $g^{(i)}$                                               | Gibbs free energy function of $i$ th phase                                                                                                        | J/mol        |
| $g_{\text{form}}$                                       | formation energy                                                                                                                                  | J/mol        |
| $g_{\text{max}}$                                        | maximum deviation from equilibrium                                                                                                                | J/mol        |
| $g_{\text{mix,ideal}}$                                  | ideal mixing energy due to configurational entropy                                                                                                | J/mol        |
| $g_{\text{mix,xs}}$                                     | excess free energy of mixing                                                                                                                      | J/mol        |
| $H_{T_o}$                                               | enthalpy of transformation at $T_o$                                                                                                               | J/mol        |
| $k$                                                     | number of nearest neighbors considered in knnalgorithm                                                                                            | —            |
| $L$                                                     | total number of Redlich-Kister mixing parameters                                                                                                  | —            |
| $L_j$                                                   | $j$ th Redlich-Kister excess mixing parameter                                                                                                     | J/mol        |
| $L_{l_1:l_2:\dots:l_{s-1}:j,k:l_{s+1}:\dots:l_S}^{(s)}$ | binary interaction parameter between the $j$ th and $k$ th species on sublattice $s$ with every other sublattice, $m$ , filled with species $l_m$ | J/mol        |
| $\mathcal{L}$                                           | distance metric between proposed and desired equilibrium properties                                                                               | —            |
| $M$                                                     | number of phases present in material system                                                                                                       | —            |
| $n$                                                     | L-norm used to weight outliers in phase diagram metric                                                                                            | —            |
| $n^{(s)}$                                               | fractional stoichiometric ratio of the sublattice, $s$                                                                                            | —            |
| $N$                                                     | number of components in the system                                                                                                                | —            |
| $P$                                                     | number of phases at equilibrium                                                                                                                   | —            |
| $p^{(i)}$                                               | $i$ th phase of the material system                                                                                                               | —            |
| $Q$                                                     | number of dimensions in free energy parameter space                                                                                               | —            |
| $R$                                                     | universal gas constant                                                                                                                            | J/(mol K)    |
| $S$                                                     | total number of sublattices                                                                                                                       | —            |
| $S_{T_o}$                                               | entropy of transformation at $T_o$                                                                                                                | J/(mol K)    |
| $T$                                                     | temperature                                                                                                                                       | K            |

*continued on next page*

Table S1: *continued...*

| Name                                   | Definition                                                                              | Units        |
|----------------------------------------|-----------------------------------------------------------------------------------------|--------------|
| $T_m$                                  | transformation temperature                                                              | K            |
| $T_{m,i}$                              | transformation temperature of $i$ th component                                          | K            |
| $T_o$                                  | reference temperature                                                                   | K            |
| $w_i$                                  | weight of or confidence in given boundary on phase diagram                              | —            |
| $x$                                    | fraction of lithium in cathode material                                                 | mol fraction |
| $y_j^{(s)}$                            | site fraction of the $j$ th species found on the $s$ sublattice                         | —            |
| $z$                                    | charge valence                                                                          | —            |
| $\Delta c$                             | analyzed composition range                                                              | mol fraction |
| $\Delta g_{\text{form}}^{(i)}$         | transformation energy between reference phase and $i$ th phase                          | J/mol        |
| $\Delta g_{j:k:\dots:l}^{\text{form}}$ | end-member formation energy of species $j, k, \dots, l$ on their respective sublattices | J/mol        |
| $\Delta H_i$                           | transformation enthalpy of $i$ th component                                             | J/mol        |
| $\Delta T$                             | analyzed temperature range                                                              | K            |
| $\Theta$                               | stability of stoichiometric compound                                                    | J/mol        |
| $\kappa$                               | gradient energy coefficient                                                             | J/m          |
| $\lambda$                              | characteristic wavelength for spinodal decomposition                                    | m            |
| $\mu^{(i)}$                            | chemical potential of the $i$ th phase                                                  | J/mol        |
| $\Phi$                                 | equilibrium voltage                                                                     | V            |
| $\sigma_{\text{property}}$             | metric for a given equilibrium property                                                 | —            |
| $\Omega^{(i)}$                         | excess free energy of mixing parameter for regular solution model                       | J/mol        |

## S2 Model Implementation

### S2.1 Regular Solution Model

The phase diagrams reported by Pelton and Thompson [1] were reproduced using the  $\alpha$  phase as the reference phase, *i.e.*,  $\Delta H_a^{(\alpha)} = \Delta H_b^{(\alpha)} = 0$ .  $T_{m,a}^{(\alpha)}$  and  $T_{m,b}^{(\alpha)}$  were arbitrarily assigned to a very large number.

Table S2: Optimized parameters for the diagrams reported by Pelton and Thompson [1]. The  $\Omega$  values in the header for each row and column indicate the values used by Pelton and Thompson to generate the phase diagrams whereas the parameters in each cell are the ones found in this work. The formation enthalpies used to generate the diagrams are  $\Delta H_a^{(\beta)} = 8$  kJ/mol and  $\Delta H_b^{(\beta)} = 12$  kJ/mol.

|                            |     | $\Omega^{(\beta)}$ kJ/mol     |                               |                               |                               |                               |
|----------------------------|-----|-------------------------------|-------------------------------|-------------------------------|-------------------------------|-------------------------------|
|                            |     | -20                           | -10                           | 0                             | 10                            | 20                            |
| $\Omega^{(\alpha)}$ kJ/mol | 30  | $\Delta H_a^{(\beta)} = 8.0$  | $\Delta H_a^{(\beta)} = 7.9$  | $\Delta H_a^{(\beta)} = 7.6$  | $\Delta H_a^{(\beta)} = 7.5$  | $\Delta H_a^{(\beta)} = 10.0$ |
|                            |     | $\Delta H_b^{(\beta)} = 11.9$ | $\Delta H_b^{(\beta)} = 11.7$ | $\Delta H_b^{(\beta)} = 11.3$ | $\Delta H_b^{(\beta)} = 11.1$ | $\Delta H_b^{(\beta)} = 11.2$ |
|                            |     | $\Omega^{(\alpha)} = -19.8$   | $\Omega^{(\alpha)} = -9.5$    | $\Omega^{(\alpha)} = 0.8$     | $\Omega^{(\alpha)} = 10.2$    | $\Omega^{(\alpha)} = 19.9$    |
|                            |     | $\Omega^{(\beta)} = 30.4$     | $\Omega^{(\beta)} = 26.6$     | $\Omega^{(\beta)} = 25.8$     | $\Omega^{(\beta)} = 25.3$     | $\Omega^{(\beta)} = 26.9$     |
|                            | 15  | $\Delta H_a^{(\beta)} = 8.3$  | $\Delta H_a^{(\beta)} = 7.9$  | $\Delta H_a^{(\beta)} = 7.2$  | $\Delta H_a^{(\beta)} = 7.2$  | $\Delta H_a^{(\beta)} = 7.8$  |
|                            |     | $\Delta H_b^{(\beta)} = 12.3$ | $\Delta H_b^{(\beta)} = 11.7$ | $\Delta H_b^{(\beta)} = 11.4$ | $\Delta H_b^{(\beta)} = 12.5$ | $\Delta H_b^{(\beta)} = 8.7$  |
|                            |     | $\Omega^{(\alpha)} = -20.6$   | $\Omega^{(\alpha)} = -9.6$    | $\Omega^{(\alpha)} = 0.5$     | $\Omega^{(\alpha)} = 9.4$     | $\Omega^{(\alpha)} = 20.2$    |
|                            |     | $\Omega^{(\beta)} = 25.6$     | $\Omega^{(\beta)} = 13.6$     | $\Omega^{(\beta)} = 14.5$     | $\Omega^{(\beta)} = 14.8$     | $\Omega^{(\beta)} = 14.9$     |
|                            | 0   | $\Delta H_a^{(\beta)} = 7.4$  | $\Delta H_a^{(\beta)} = 6.4$  | $\Delta H_a^{(\beta)} = 7.7$  | $\Delta H_a^{(\beta)} = 7.5$  | $\Delta H_a^{(\beta)} = 7.6$  |
|                            |     | $\Delta H_b^{(\beta)} = 11.2$ | $\Delta H_b^{(\beta)} = 9.3$  | $\Delta H_b^{(\beta)} = 9.6$  | $\Delta H_b^{(\beta)} = 10.9$ | $\Delta H_b^{(\beta)} = 11.8$ |
|                            |     | $\Omega^{(\alpha)} = -17.5$   | $\Omega^{(\alpha)} = -4.7$    | $\Omega^{(\alpha)} = 1.0$     | $\Omega^{(\alpha)} = 9.9$     | $\Omega^{(\alpha)} = 20.3$    |
|                            |     | $\Omega^{(\beta)} = 0.8$      | $\Omega^{(\beta)} = 3.0$      | $\Omega^{(\beta)} = 0.4$      | $\Omega^{(\beta)} = 0.7$      | $\Omega^{(\beta)} = 1.4$      |
|                            | -15 | $\Delta H_a^{(\beta)} = 5.9$  | $\Delta H_a^{(\beta)} = 6.4$  | $\Delta H_a^{(\beta)} = 8.1$  | $\Delta H_a^{(\beta)} = 7.8$  | $\Delta H_a^{(\beta)} = 8.2$  |
|                            |     | $\Delta H_b^{(\beta)} = 8.8$  | $\Delta H_b^{(\beta)} = 13.1$ | $\Delta H_b^{(\beta)} = 12.1$ | $\Delta H_b^{(\beta)} = 11.8$ | $\Delta H_b^{(\beta)} = 12.6$ |
|                            |     | $\Omega^{(\alpha)} = -12.4$   | $\Omega^{(\alpha)} = -10.1$   | $\Omega^{(\alpha)} = -3.3$    | $\Omega^{(\alpha)} = 9.3$     | $\Omega^{(\alpha)} = 16.7$    |
|                            |     | $\Omega^{(\beta)} = -8.8$     | $\Omega^{(\beta)} = -13.2$    | $\Omega^{(\beta)} = -18.1$    | $\Omega^{(\beta)} = 14.4$     | $\Omega^{(\beta)} = 17.6$     |

## S2.2 Electrolyte Systems

The ten electrolyte phase diagrams were modeled using stoichiometric line compounds for the solid phases and a Redlich-Kister for the liquid phase:

$$\begin{aligned}
 \Delta g^{(l)}(c, T) &= RT(c \ln(c) + (1-c) \ln(1-c)) \\
 &\quad + c(1-c) \left( L_o^{(l)} + L_1^{(l)}(2c-1) + L_2^{(l)}(2c-1)^2 \right) \\
 \Delta g^{(s,a)}(c, T) &= \Delta H^{(s,a)} \left( 1 - T/T_m^{(s,a)} \right) + \Theta c^2 \\
 \Delta g^{(s,b)}(c, T) &= \Delta H^{(s,b)} \left( 1 - T/T_m^{(s,b)} \right) + \Theta (1-c)^2 \\
 \Delta g^{(\text{DMC-II})}(c, T) &= \Delta H^{(\text{DMC-II})} \left( 1 - T/T_m^{(\text{DMC-II})} \right) + \Theta (1 - c_{\text{DMC-II}})^2
 \end{aligned} \tag{S1}$$

where the liquid phase has already been simplified as the reference phase. The formation enthalpies and transformation temperatures were taken from experiments reported in liter-

ature [2].

Table S3: Optimized parameters for electrolyte systems.

| <u>DMC+EC</u>            | <u>EMC+EC</u>            | <u>DEC+EC</u>            | <u>PC+EC</u>              | <u>PC+DMC</u>            |
|--------------------------|--------------------------|--------------------------|---------------------------|--------------------------|
| $L_{\circ}^{(l)} = 3504$ | $L_{\circ}^{(l)} = 2442$ | $L_{\circ}^{(l)} = 3504$ | $L_{\circ}^{(l)} = -1310$ | $L_{\circ}^{(l)} = 3504$ |
| $L_1^{(l)} = -292$       | $L_1^{(l)} = -434$       | $L_1^{(l)} = -292$       | $L_1^{(l)} = 889$         | $L_1^{(l)} = -292$       |
| $L_2^{(l)} = -429$       | $L_2^{(l)} = -558$       | $L_2^{(l)} = -429$       | $L_2^{(l)} = -1943$       | $L_2^{(l)} = -429$       |
| <u>PC+EMC</u>            | <u>PC+DEC</u>            | <u>EMC+DMC</u>           | <u>DEC+DMC</u>            | <u>DEC+EMC</u>           |
| $L_{\circ}^{(l)} = 1075$ | $L_{\circ}^{(l)} = 1165$ | $L_{\circ}^{(l)} = -569$ | $L_{\circ}^{(l)} = -429$  | $L_{\circ}^{(l)} = -207$ |
| $L_1^{(l)} = 920$        | $L_1^{(l)} = 601$        | $L_1^{(l)} = 250$        | $L_1^{(l)} = 1$           | $L_1^{(l)} = 78$         |
| $L_2^{(l)} = 577$        | $L_2^{(l)} = 665$        | $L_2^{(l)} = -506$       | $L_2^{(l)} = -256$        | $L_2^{(l)} = -162$       |

### S2.3 Lithium Iron Phosphate System

The LFP system was modeled with three different sublattice models, SRO, LRO and T-LRO:

$$\begin{aligned}
g^{(\text{SRO})}(c, T) = & -c^2 T \Delta S_{\text{Li}^+ \text{Fe}^{+2}}^{(\text{SRO})} + c(1-c) \left( \Delta H_{\text{Va:Fe}^{+2}}^{(\text{SRO})} - T \Delta S_{\text{Va:Fe}^{+2}}^{(\text{SRO})} \right) \\
& - (1-c)^2 T \Delta S_{\text{Va:Fe}^{+3}}^{(\text{SRO})} + c(1-c) \Delta H_{\text{Li}^+ \text{Fe}^{+3}}^{(\text{SRO})} \\
& + 2RT \left( c \ln(c) + (1-c) \ln(1-c) \right) \\
& + c^2 (1-c)^2 \left( a_{\circ}^{(\text{SRO})} + b_{\circ}^{(\text{SRO})} \right) T + (2c-1) \left( a_{1/2}^{(\text{SRO})} + b_{1/2}^{(\text{SRO})} \right) T
\end{aligned} \tag{S2}$$

$$\begin{aligned}
g^{(\text{T-LRO})}(c, T) = & \min_{\frac{3}{5}y_{\text{Li}^+}^{(0)} + \frac{2}{5}y_{\text{Li}^+}^{(1)} = c} \left( y_{\text{Li}^+}^{(0)} y_{\text{Li}^+}^{(1)} (1-c) \left( \Delta H_{\text{LiFePO}_4^+}^{(\text{T-LRO})} - T \Delta S_{\text{LiFePO}_4^+}^{(\text{T-LRO})} \right) \right. \\
& + \frac{1}{5} y_{\text{Li}^+}^{(0)} \left( 1 - y_{\text{Li}^+}^{(1)} \right) (1-c) \left( 3 \Delta H_{\text{LiFePO}_4^+}^{(\text{T-LRO})} - 3 T \Delta S_{\text{LiFePO}_4^+}^{(\text{T-LRO})} + \Delta G_{\text{adjust}_2}^{(\text{T-LRO})} \right) \\
& + \frac{2}{5} \left( 1 - y_{\text{Li}^+}^{(0)} \right) y_{\text{Li}^+}^{(1)} (1-c) \left( \Delta H_{\text{LiFePO}_4^+}^{(\text{T-LRO})} - T \Delta S_{\text{LiFePO}_4^+}^{(\text{T-LRO})} \right) \\
& + \frac{1}{5} y_{\text{Li}^+}^{(0)} \left( 1 - y_{\text{Li}^+}^{(1)} \right) c \left( 2 \Delta H_{\text{FePO}_4^-}^{(\text{T-LRO})} - 2 T \Delta S_{\text{FePO}_4^-}^{(\text{T-LRO})} + \Delta G_{\text{adjust}_1}^{(\text{T-LRO})} \right) \\
& + \frac{3}{5} \left( 1 - y_{\text{Li}^+}^{(0)} \right) y_{\text{Li}^+}^{(1)} c \left( \Delta H_{\text{FePO}_4^-}^{(\text{T-LRO})} - T \Delta S_{\text{FePO}_4^-}^{(\text{T-LRO})} \right) \\
& + \frac{1}{5} \left( 1 - y_{\text{Li}^+}^{(0)} \right) \left( 1 - y_{\text{Li}^+}^{(1)} \right) c \left( \Delta H_{\text{FePO}_4^-}^{(\text{T-LRO})} - T \Delta S_{\text{FePO}_4^-}^{(\text{T-LRO})} \right) \\
& + \frac{1}{5} RT \left( 3 y_{\text{Li}^+}^{(0)} \ln \left( y_{\text{Li}^+}^{(0)} \right) \quad + 3 \left( 1 - y_{\text{Li}^+}^{(0)} \right) \ln \left( 1 - y_{\text{Li}^+}^{(0)} \right) \right. \\
& \quad \quad \quad + 2 y_{\text{Li}^+}^{(1)} \ln \left( y_{\text{Li}^+}^{(1)} \right) \quad + 2 \left( 1 - y_{\text{Li}^+}^{(1)} \right) \ln \left( 1 - y_{\text{Li}^+}^{(1)} \right) \\
& \quad \quad \quad \left. + 5c \ln(c) \quad \quad \quad + 5(1-c) \ln(1-c) \right) \Big)
\end{aligned} \tag{S3}$$

where LRO is obtained by setting  $\Delta S_{\text{LiFePO}_4^+}^{(\text{T-LRO})} = \Delta S_{\text{FePO}_4^-}^{(\text{T-LRO})} = 0$ . In SRO, higher order inter-sublattice interactions have been accounted for using the method described by Hillert [3]. In addition, compound energy formalism [3, 4] is used to relate the formation energy of the end-members, *e.g.*  $\Delta g_{j:k;\dots;l}^{\text{form}}(T)$ , to each other based on their physical similarities, see [5] for more details.

Table S4: Search ranges and optimized parameters for each model for the LFP system. Values reported from Lee [6] and Phan *et al.* [7] and used to reproduce their work are included in the literature column.

| model | parameter                                              | lower | upper | literature | <b>O</b> | <b>D</b> | <b>P</b> | units     |
|-------|--------------------------------------------------------|-------|-------|------------|----------|----------|----------|-----------|
| SRO   | $\Delta H_{\text{Li}^+:\text{Fe}^{+3}}^{(\text{SRO})}$ | -1000 | 0     | -420       | -310     | -98      | -336     | kJ/mol    |
|       | $\Delta H_{\text{Va}:\text{Fe}^{+2}}^{(\text{SRO})}$   | -1000 | 0     | -100       | -202     | -430     | -218     | kJ/mol    |
|       | $\Delta S_{\text{Li}^+:\text{Fe}^{+2}}^{(\text{SRO})}$ | -100  | 100   | -19        | 30       | 83       | 97       | J/(mol K) |
|       | $\Delta S_{\text{Va}:\text{Fe}^{+3}}^{(\text{SRO})}$   | -100  | 100   | -32        | -60      | -6       | -46      | J/(mol K) |
|       | $\Delta S_{\text{Va}:\text{Fe}^{+2}}^{(\text{SRO})}$   | -100  | 100   | -3         | -93      | 41       | 59       | J/(mol K) |
|       | $a_{\circ}^{(\text{SRO})}$                             | -100  | 100   | -74        | -67      | -62      | -16      | kJ/mol    |
|       | $b_{\circ}^{(\text{SRO})}$                             | -100  | 100   | 81         | 64       | 58       | -20      | J/(mol K) |
|       | $a_{1/2}^{(\text{SRO})}$                               | -100  | 100   | 5          | 15       | 4        | -12      | kJ/mol    |

*continued on next page*

Table S4: *continued...*

| model | parameter                                       | lower | upper | literature | <b>O</b> | <b>D</b> | <b>P</b> | units     |
|-------|-------------------------------------------------|-------|-------|------------|----------|----------|----------|-----------|
|       | $b_{1/2}^{(\text{SRO})}$                        | -100  | 100   | -19        | -39      | -19      | 17       | J/(mol K) |
| LRO   | $\Delta H_{\text{LiFePO}_4^+}^{(\text{LRO})}$   | -100  | 100   | 15         | 0.8      | 5        | -55      | kJ/mol    |
|       | $\Delta H_{\text{FePO}_4^-}^{(\text{LRO})}$     | -100  | 100   | 15         | 29       | 25       | 85       | kJ/mol    |
|       | $\Delta G_{\text{adjust}_1}^{(\text{LRO})}$     | -100  | 100   | -20        | -19      | -21      | -20      | kJ/mol    |
|       | $\Delta G_{\text{adjust}_2}^{(\text{LRO})}$     | -100  | 100   | -29        | -29      | -31      | -30      | kJ/mol    |
| T-LRO | $\Delta H_{\text{LiFePO}_4^+}^{(\text{T-LRO})}$ | -100  | 100   | —          | —        | 58       | -39      | kJ/mol    |
|       | $\Delta H_{\text{FePO}_4^-}^{(\text{T-LRO})}$   | -100  | 100   | —          | —        | -6       | 86       | kJ/mol    |
|       | $\Delta G_{\text{adjust}_1}^{(\text{T-LRO})}$   | -100  | 100   | —          | —        | -26      | -24      | kJ/mol    |
|       | $\Delta G_{\text{adjust}_2}^{(\text{T-LRO})}$   | -100  | 100   | —          | —        | -36      | -33      | kJ/mol    |
|       | $\Delta S_{\text{LiFePO}_4^+}^{(\text{T-LRO})}$ | -100  | 100   | —          | —        | 63       | -56      | J/(mol K) |
|       | $\Delta H_{\text{FePO}_4^-}^{(\text{T-LRO})}$   | -100  | 100   | —          | —        | -27      | 85       | J/(mol K) |

Voltages reported for SRO and LRO were taken from literature [6, 7] whereas the T-LRO had its two-phase chemical potential optimized to  $\pm 0.2$  mV of the reported two-phase region [8].

## S2.4 Lithium Cobalt Oxide System

The LCO system had four phases modeled:

$$\begin{aligned}
\Delta g^{(\text{O1})}(c, T) &= \Delta G^{(\text{O1})} + \Theta c^2 \\
\Delta g^{(\text{H13})}(c, T) &= \Delta G_{\text{CoO}_3}^{(\text{H13})}(1 - 2c) + \Delta G_{\text{LiCoO}_3}^{(\text{H13})} 2c \\
&\quad + \frac{1}{2} RT (2c \ln(2c) + (1 - 2c) \ln(1 - 2c)) \\
&\quad + 2c(1 - 2c) \left( (a_{\circ}^{(\text{H13})} + b_{\circ}^{(\text{H13})} T) + (a_1^{(\text{H13})} + b_1^{(\text{H13})} T)(4c - 1) \right) \\
\Delta g^{(\text{O3})}(c, T) &= RT (c \ln(c) + (1 - c) \ln(1 - c)) \\
&\quad + c(1 - c) \left( (a_{\circ}^{(\text{O3})} + b_{\circ}^{(\text{O3})} T) + (a_1^{(\text{O3})} + b_1^{(\text{O3})} T)(2c - 1) \right) \\
\Delta g^{(\text{I})}(c, T) &= \Delta G_{\text{CoO}_3}^{(\text{I})}(1 - c) + \Delta G_{\text{LiCoO}_3}^{(\text{I})} c \\
&\quad + RT (c \ln(c) + (1 - c) \ln(1 - c)) \\
&\quad + c(1 - c) \Omega^{(\text{I})}
\end{aligned} \tag{S4}$$

In the parameter optimization, the equilibrium voltage profile was included by calculating the residual of the root mean squared error between predicted and experimental data after using it to optimize the chemical potential of LCO relative to lithium.

Table S5: Search ranges and optimized parameters for the LCO system. The *gibbs.ML* header indicates the phase diagram and associated free energy proposed in this work.

| parameter                           | search bounds |       | without (I) phase |       |                 | with (I) phase |       |                 | units     |
|-------------------------------------|---------------|-------|-------------------|-------|-----------------|----------------|-------|-----------------|-----------|
|                                     | lower         | upper | [9]               | [10]  | <i>gibbs.ML</i> | [9]            | [10]  | <i>gibbs.ML</i> |           |
| $\Delta G^{(O1)}$                   | -10           | 0     | -3.4              | -2.9  | -4.6            | -4.0           | -2.1  | -4.3            | kJ/mol    |
| $\Delta G_{\text{CoO}_3}^{(H13)}$   | -10           | 0     | -0.3              | 0.3   | -1.6            | -2.1           | 1.4   | -1.0            | kJ/mol    |
| $\Delta G_{\text{LiCoO}_3}^{(H13)}$ | 0             | 10    | 1.5               | 3.4   | -0.4            | 3.0            | -3.0  | 0.1             | kJ/mol    |
| $a_o^{(H13)}$                       | -50           | -10   | -44.6             | -50.7 | -49.3           | -55.4          | -52.6 | -49.0           | kJ/mol    |
| $b_o^{(H13)}$                       | 0             | 100   | -17.2             | 10.9  | 10.1            | 5.9            | 73.1  | 6.7             | J/(mol K) |
| $a_1^{(H13)}$                       | 0             | 30    | 10.0              | -1.1  | 3.2             | -6.4           | 26.9  | 7.1             | kJ/mol    |
| $b_1^{(H13)}$                       | 0             | 100   | -13.5             | 32    | -2.4            | -7.5           | 36.0  | 14.0            | J/(mol K) |
| $a_o^{(O3)}$                        | -70           | -10   | -59.7             | -61.6 | -61.2           | -63.9          | -63.2 | -61.7           | kJ/mol    |
| $b_o^{(O3)}$                        | 0             | 100   | -2.3              | 13.1  | 22.7            | 24.0           | 20.1  | 17.5            | J/(mol K) |
| $a_1^{(O3)}$                        | -30           | 30    | -32.8             | -13.0 | 16.5            | 2.9            | 9.0   | 15.7            | kJ/mol    |
| $b_1^{(O3)}$                        | 0             | 100   | 21.6              | 75.7  | 3.1             | 16.0           | 1.2   | 7.9             | J/(mol K) |
| $\Delta G_{\text{CoO}_3}^{(I)}$     | -2            | 10    | —                 | —     | —               | -1.0           | 1.5   | 0.5             | kJ/mol    |
| $\Delta G_{\text{LiCoO}_3}^{(I)}$   | -5            | -1    | —                 | —     | —               | -2.8           | -2.7  | -2.2            | kJ/mol    |
| $\Omega^{(I)}$                      | -30           | 30    | —                 | —     | —               | -28.0          | -34.8 | -28.4           | kJ/mol    |

## References

- [1] A. D. Pelton and W. T. Thompson. “Phase diagrams.” *Prog. Solid State Chem.*, 10, 119, 1975.
- [2] M. S. Ding. “Excess Gibbs energy of mixing for organic carbonates from fitting of their binary phase diagrams with nonideal solution models.” *J. Solution Chem.*, 34, 343, 2005.
- [3] M. Hillert. “The compound energy formalism.” *J. Alloys Compd.*, 320, 161, 2001.
- [4] J.-O. Andersson, A. Guillermet, M. Hillert, B. Jansson, and B. Sundman. “A compound-energy model of ordering in a phase with sites of different coordination numbers.” *Acta Metall.*, 34, 437, 1986.
- [5] G. Cacciamani. “An Introduction to the Calphad method and the compound energy formalism (CEF).” *Tecnol. em Metal. Mater. e Mineração*, 13, 16, 2016.
- [6] S. H. Lee. “A study of ionic materials for the energy applications through first-principles calculations and Calphad modeling.” Doctor of philosophy, Penn State, 2011.
- [7] A. T. Phan, A. E. Gheribi, and P. Chartrand. “Modelling of phase equilibria of  $\text{LiFePO}_4$ - $\text{FePO}_4$  olivine join for cathode material.” *Can. J. Chem. Eng.*, 97, 2224, 2019.
- [8] A. Yamada, H. Koizumi, S. I. Nishimura, N. Sonoyama, R. Kanno, M. Yonemura, T. Nakamura, and Y. O. Kobayashi. “Room-temperature miscibility gap in  $\text{Li}_x\text{FePO}_4$ .” *Nat. Mater.*, 5, 357, 2006.
- [9] T. Abe and T. Koyama. “Thermodynamic modeling of the  $\text{LiCoO}_2$ - $\text{CoO}_2$  pseudo-binary system.” *Calphad Comput. Coupling Phase Diagrams Thermochem.*, 35, 209, 2011.
- [10] K. Chang, B. Hallstedt, D. Music, J. Fischer, C. Ziebert, S. Ulrich, and H. J. Seifert. “Thermodynamic description of the layered O3 and O2 structural  $\text{LiCoO}_2$ - $\text{CoO}_2$  pseudo-binary systems.” *Calphad Comput. Coupling Phase Diagrams Thermochem.*, 41, 6, 2013.
